# Supplementary material for: TSC loss distorts DNA replication programme and sensitises cells to genotoxic stress
Source: PubMed Central journal article supplement (PMC5356742; doi:10.18632/oncotarget.13378), 2016-11-16
Supplement: oncotarget-07-85365-s001.pdf [file oncotarget-07-85365-s001.pdf]

## **TSC loss distorts DNA replication programme and sensitises cells to genotoxic stress**

### **SUPPLEMENTARY DATA**

### **SUPPLEMENTARY METHOD**

#### **Cell cycle stage-specific cell death profiles**

MEF cells, either untreated or treated as indicated, were fed with 5µg/mL Hoechst33342 (B2261, SIGMA) live-cell DNA stain for 30mins, harvested by Accutase-treatment and pooled with media supernatant to gather detached, dead cells, centrifuged at 700xg, washed once in cold wash buffer (PBS with 5 % FCS, 4.5g/L D-glucose, MEM vitamins), resuspended in 300 µL of the binding

buffer containing Annexin-V-FITC and propidium iodide (BD Pharmingen™) as per manufacturer's recommendations. Samples were analysed on a BD LSRFortessa™ cell analyzer with 355nm, 405nm, 488nm and 640nm laser configuration. Cells pre-gated for singlets were used for Sub-G1 DNA content, percent AnnexinV-FITC positive and percent PI positive cells in G1, S or G2-M stages for analysis of cell death. FlowJo software was used for analysis and quantification.

## SUPPLEMENTARY FIGURES

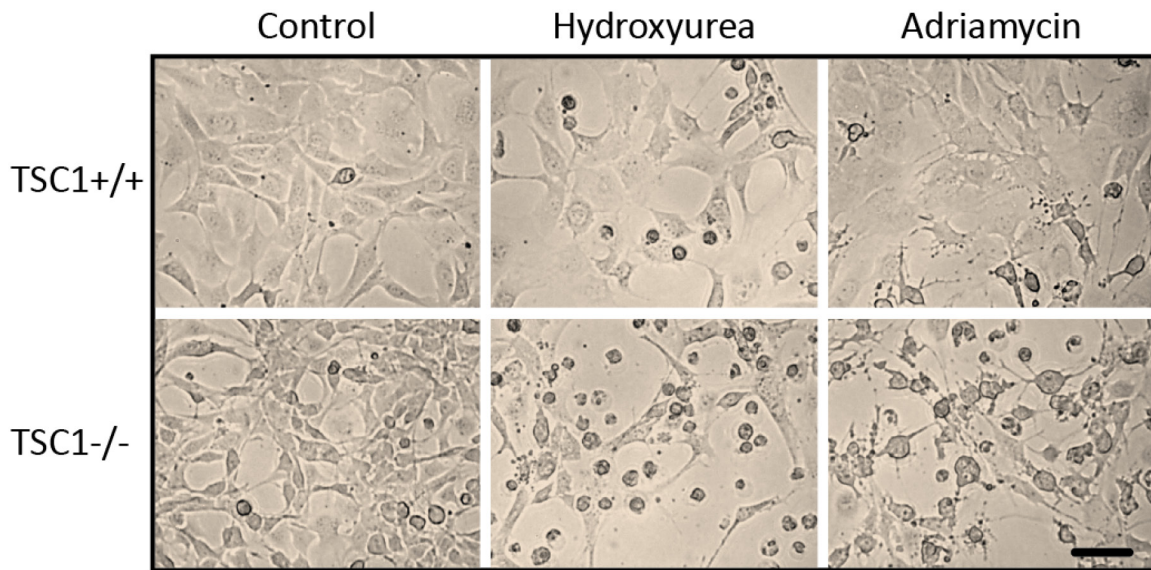

**Supplementary Figure S1: TSC1 loss sensitizes cells to genotoxic stress-induced cell death.** Light microscopic images of TSC1<sup>+/+</sup> and TSC1<sup>-/-</sup> MEFs, untreated or treated with Hydroxyurea (2 mM) and Adriamycin (0.5 μg/ml) respectively, for 20 h. Note the detachment and rounding-off of treated TSC1<sup>-/-</sup> cells compared to the untreated controls and their wt counterparts. Scale bar = 10 μm.

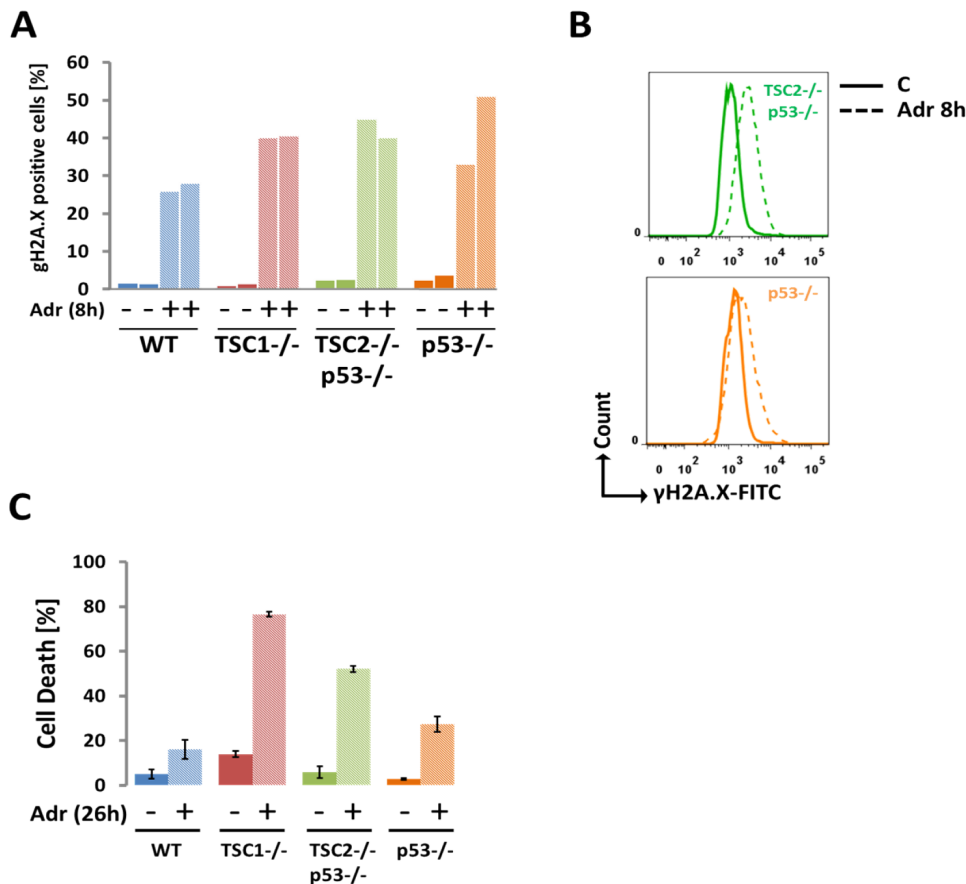

**Supplementary Figure S2: TSC2<sup>-/-</sup> p53<sup>-/-</sup> MEFs undergo profound cell death following mild genotoxic treatment.** **A.** Ser139-phosphorylated H2AX flow cytometry for DNA damage estimation (n=2), in WT, TSC1<sup>-/-</sup>, TSC2<sup>-/-</sup>p53<sup>-/-</sup> and p53<sup>-/-</sup> MEFs untreated or acutely treated with 0.5 μg/ml Adr for 8h. **B.** Representative histograms of TSC2<sup>-/-</sup>p53<sup>-/-</sup> and p53<sup>-/-</sup> MEFs from the same experiment. **C.** A typical experiment of propidium iodide (PI) exclusion flow cytometry for cell death quantification. WT, TSC1<sup>-/-</sup>, TSC2<sup>-/-</sup>p53<sup>-/-</sup> and p53<sup>-/-</sup> MEFs untreated or treated with Adriamycin (Adr, 0.5μg/mL) for 26h. Data-set are a mean of triplicate samples from one experiment. Error bars represent standard deviation (SD).

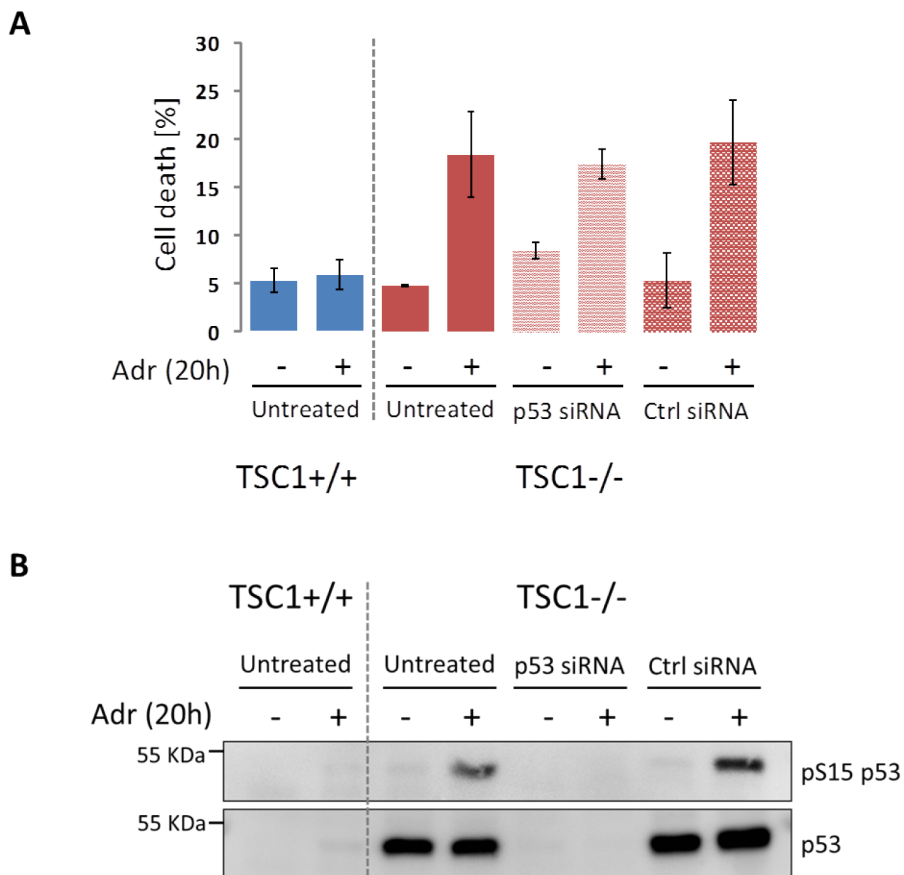

**Supplementary Figure S3: TSC1<sup>-/-</sup> cell death is independent of p53 activity.** **A.** Propidium iodide (PI) exclusion terminal cell death assay for WT and TSC1<sup>-/-</sup> MEFs untreated or treated with Adriamycin (Adr, 0.5 μg/ml, 20 h) following siRNA-mediated p53 depletion. TSC1<sup>+/+</sup> MEFs untreated or treated with Adriamycin were used as reference. Data-set are a mean of duplicate samples from two independent experiments. Error bars represent standard deviation (SD). **B.** Representative western blot showing efficiency of p53 knockdown. Non-target control siRNA knockdown neither altered p53 expression nor cell death in TSC1<sup>-/-</sup> cells.

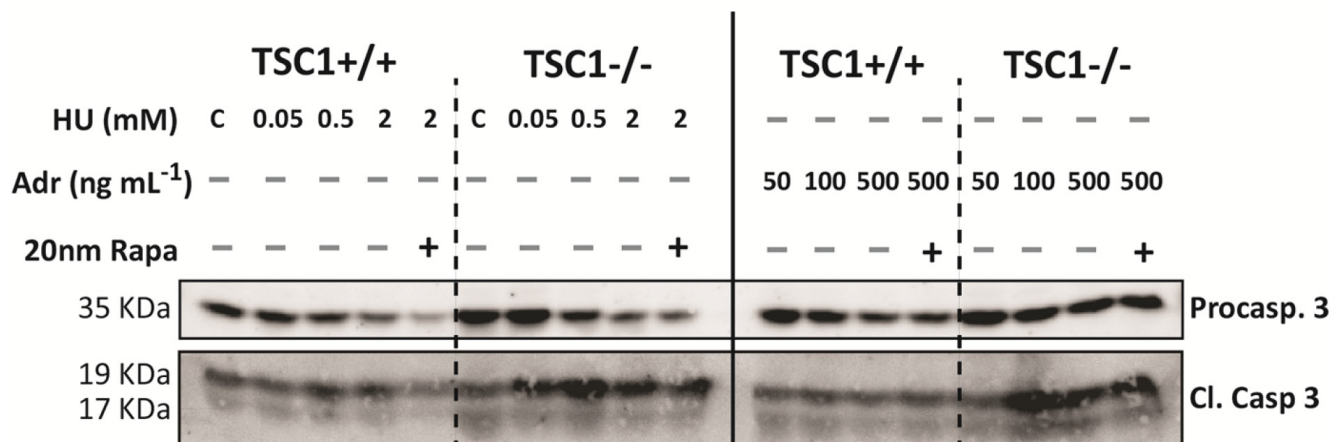

**Supplementary Figure S4: Low threshold of DNA damage-induced cell death in TSC1<sup>-/-</sup> MEFs.** Dose-response western blot analysis of TSC1<sup>+/+</sup> and TSC1<sup>-/-</sup> MEFs under genotoxic treatments. All treatments were for 20 h. Cleaved caspase-3, an early marker of apoptosis, is far more evident at low doses of genotoxins in TSC1<sup>-/-</sup> MEFs compared to TSC1<sup>+/+</sup> MEFs.

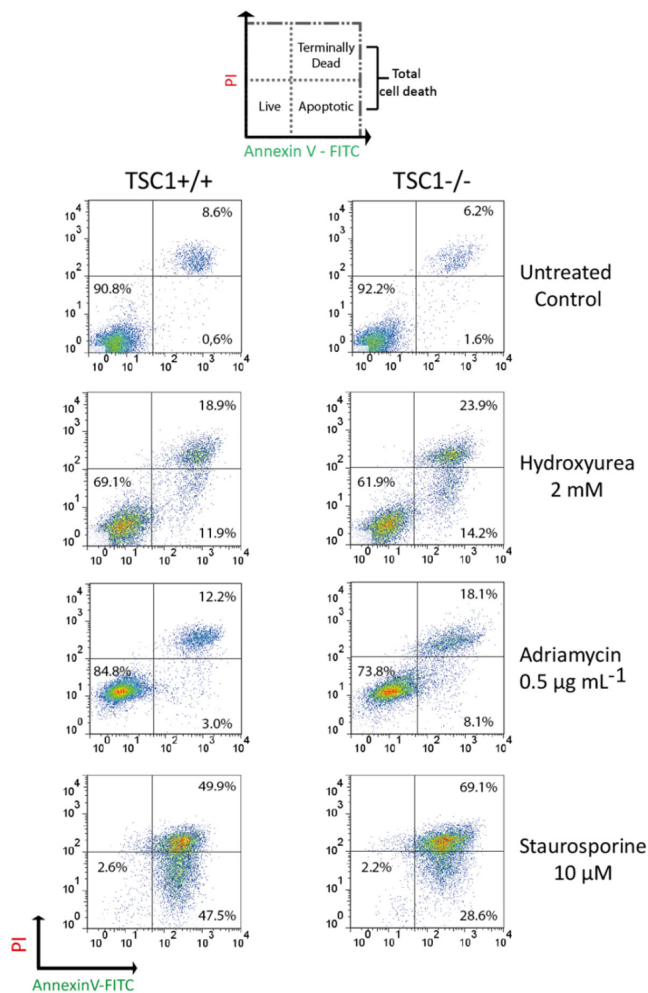

**Supplementary Figure S5: Apoptosis is not the sole mode of cell death in TSC1<sup>-/-</sup> MEFs under mild genotoxic stress.** Representative Annexin-V / Propidium Iodide dual labelling live-cell flow cytometry dot-plots of TSC1<sup>+/+</sup> and TSC1<sup>-/-</sup> MEFs subjected to HU and Adr treatment. Cell death toll (sum of Annexin-V positive and Annexin-V/PI double positive cells) in TSC1<sup>-/-</sup> MEFs far exceeds the fraction of bona fide apoptotic (Annexin-V positive) cells, implying that additional cell death mechanisms cannot be ruled out.

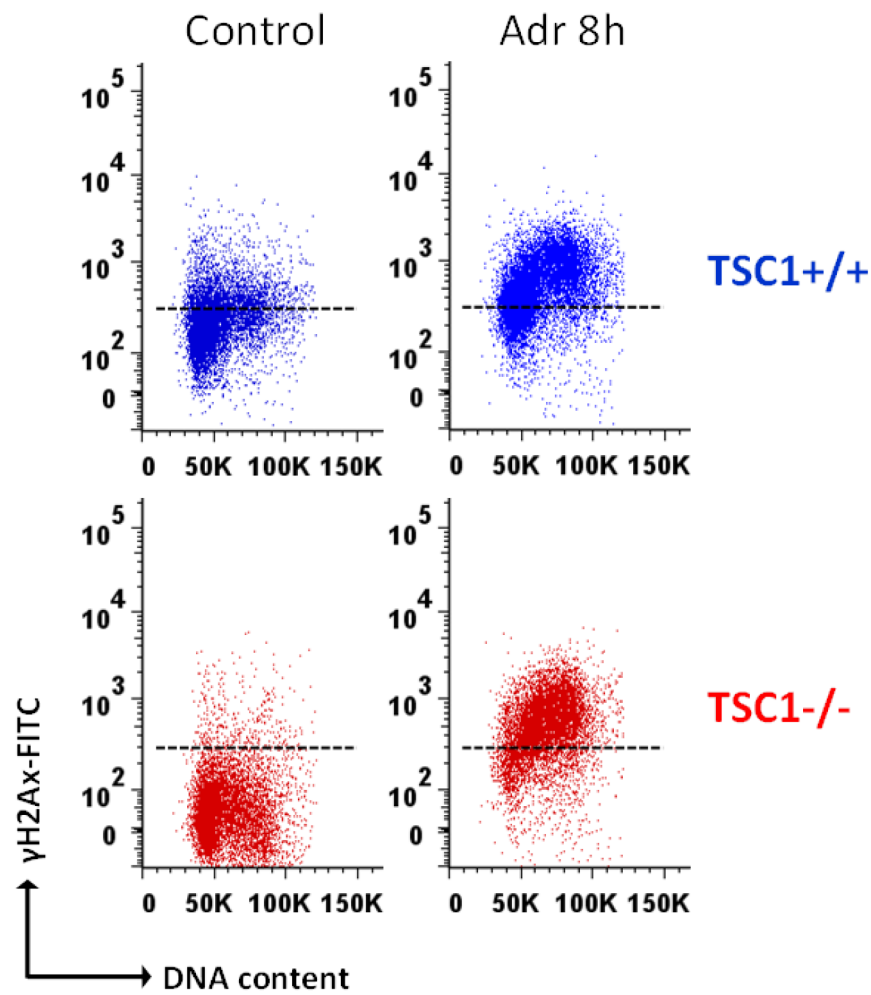

**Supplementary Figure S6: TSC1<sup>-/-</sup> cells gather more primary genetic insults under genotoxic stress.** Representative dot plots of Ser139-phosphorylated H2AX /DNA content (propidium iodide) flow cytometry for DNA damage estimation in TSC1<sup>+/+</sup> and TSC1<sup>-/-</sup> MEFs, untreated or acutely treated with 0.5 μg/ml Adr for 8h. Percentage of γH2AX-positive events is labelled within the gates. These data and those shown in Figure 2A represent the same experiment.

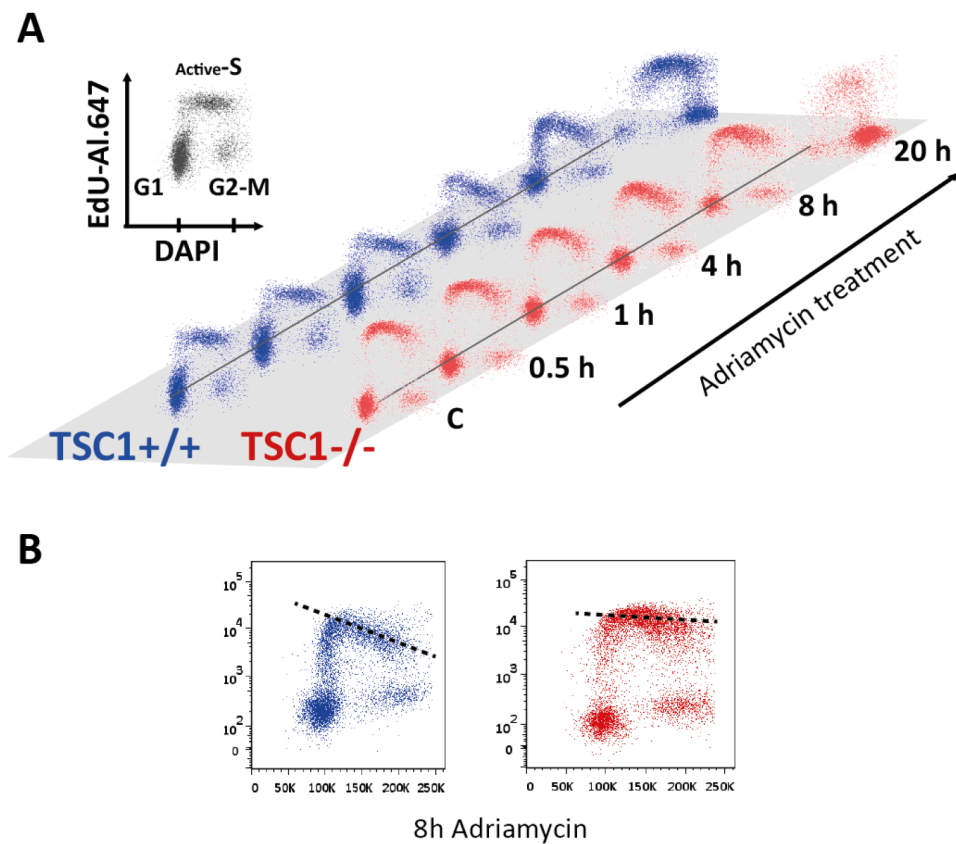

**Supplementary Figure S7: Incessant global nucleotide incorporation in TSC1<sup>-/-</sup> MEFs despite genotoxic stress.** **A.** Representative EdU pulse incorporation flow cytometry cell cycle profiles of TSC1<sup>+/+</sup> and TSC1<sup>-/-</sup> MEFs either untreated, or after Adriamycin treatment followed in time for up to 20 h. **B.** Excerpt (8 h points) from the series in A. Observe the decline in nucleotide incorporation in late S-phase at 8 h in WT MEFs compared to the incessant incorporation rates in TSC1<sup>-/-</sup> MEFs, seemingly unchanged by the presence of the drug. The black dotted line is arbitrary and meant for illustrative purpose only.



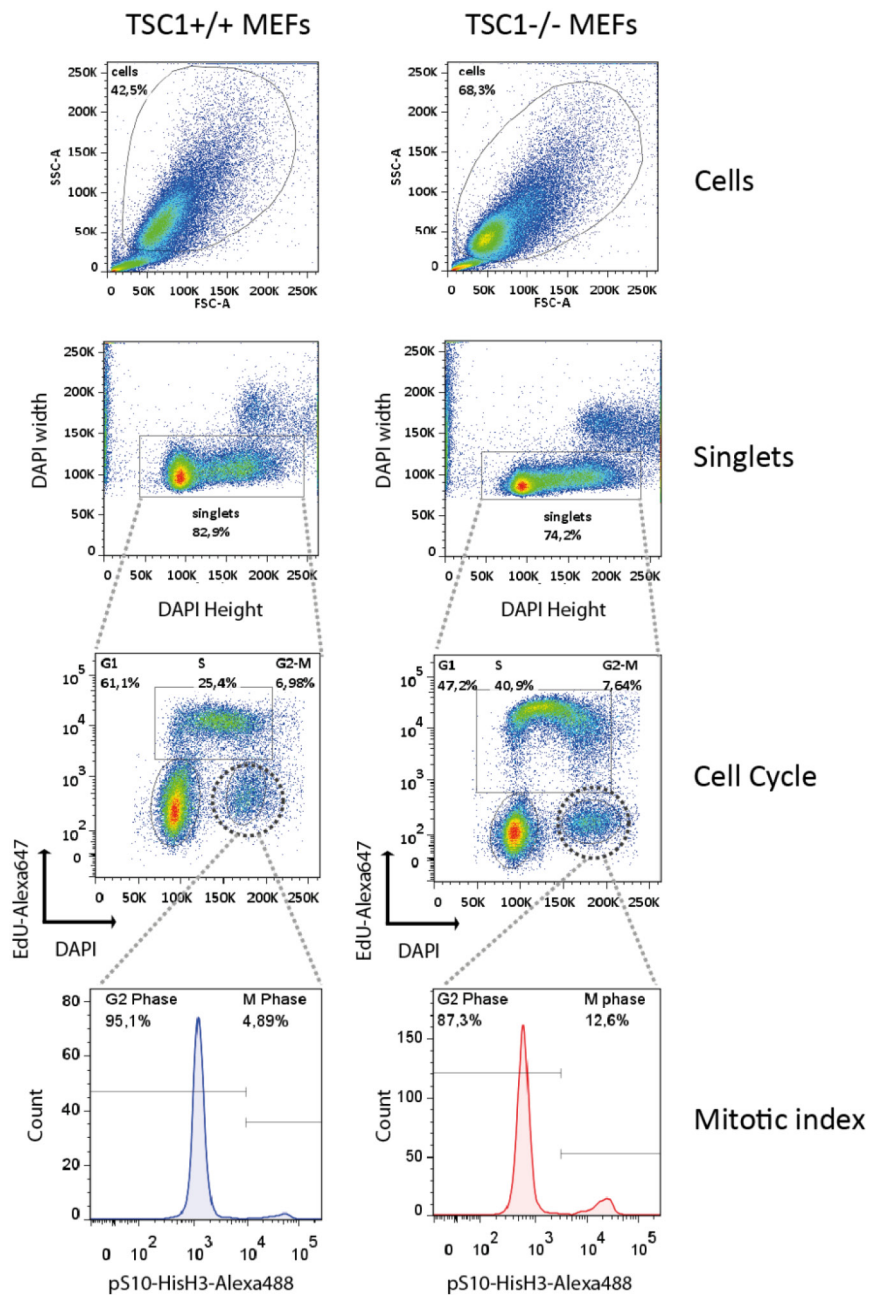

**Supplementary Figure S8: Gating strategy for cell cycle profiling and G2-M analyses by Flow cytometry.** Gating strategy for EdU pulse incorporation / DAPI / pSer10-HisH3 flow cytometry. Singlets were used for the cell cycle analysis and the G2-M subpopulation to estimate the mitotic index.

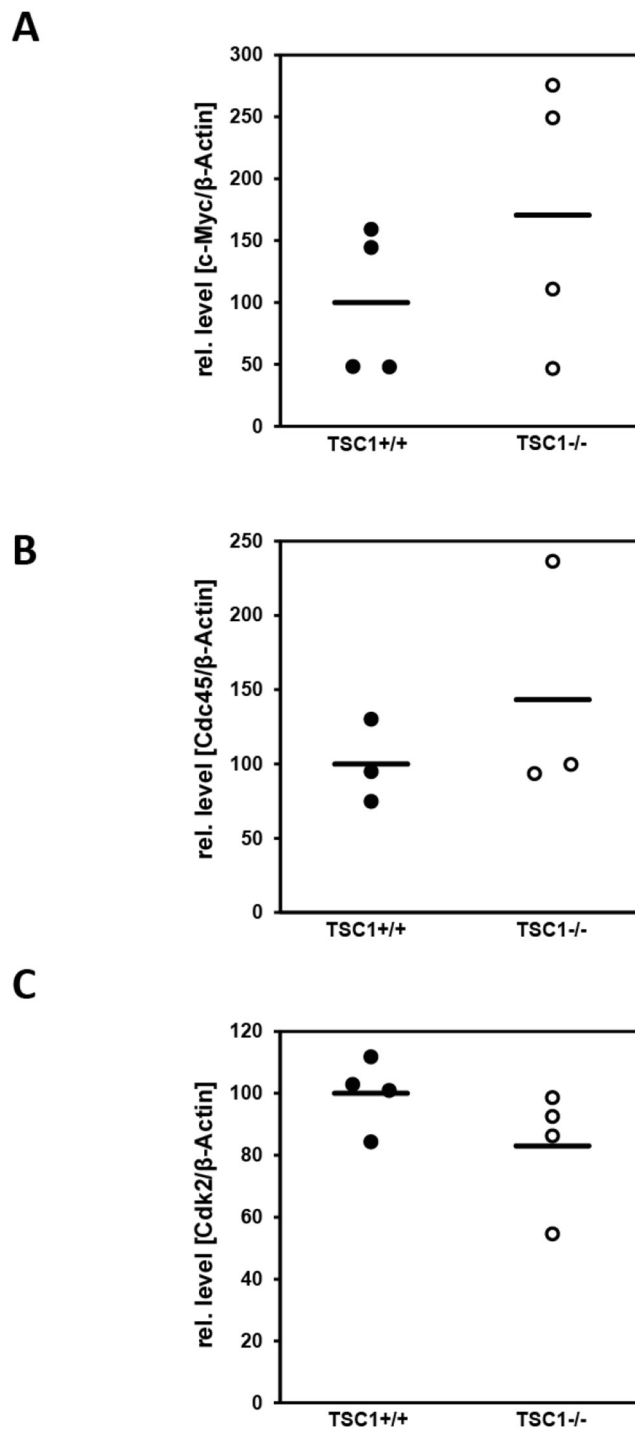

**Supplementary Figure S9: S-phase regulation and DNA replication factors in TSC1<sup>-/-</sup> MEFs.** Relative expression levels in cycling cell populations of the replication factors A. c-Myc, B. Cdc45, and C. the S-phase cyclin-dependent kinase Cdk2, respectively.

A

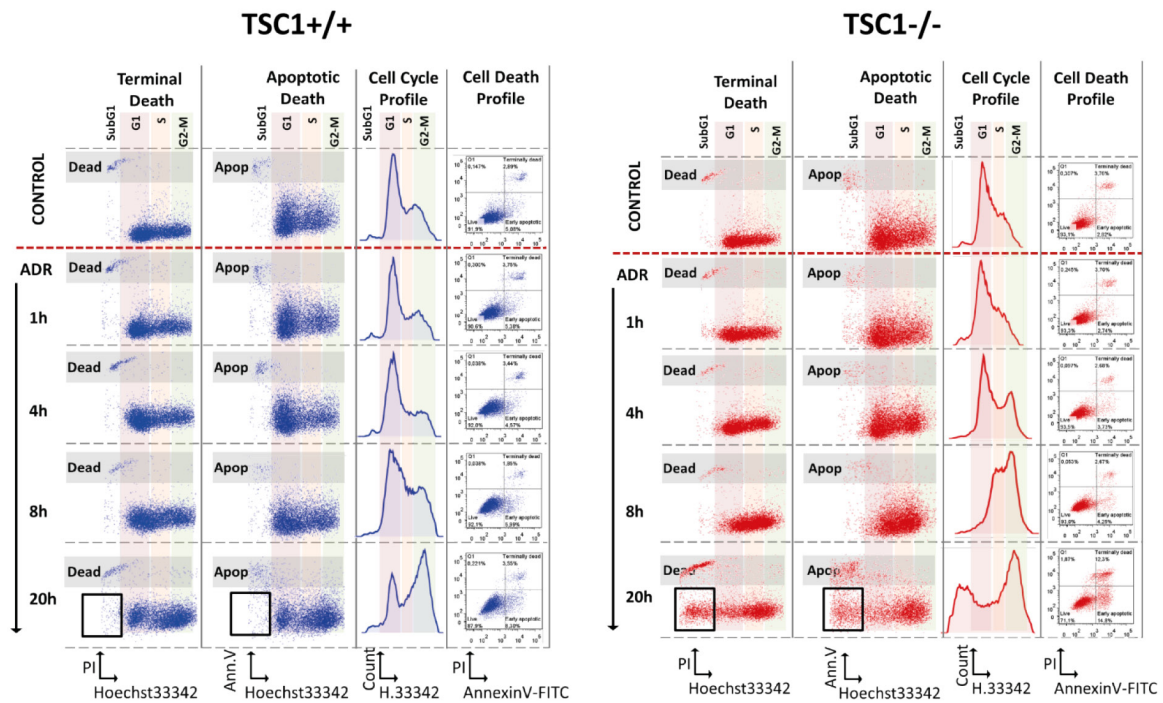

B

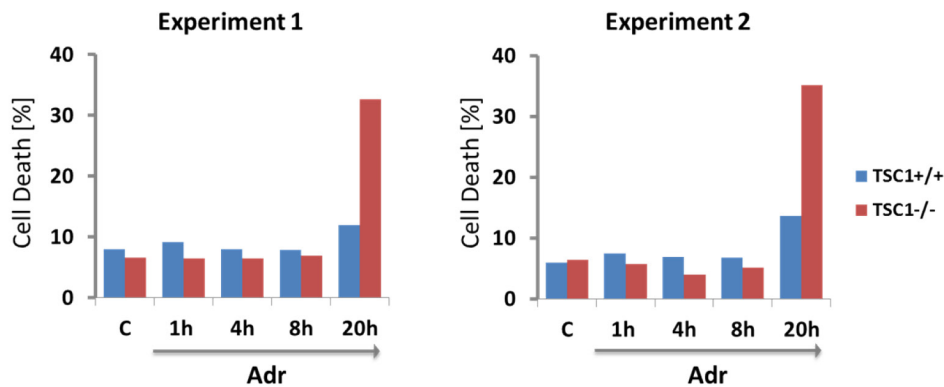

**Supplementary Figure S10: Cell death kinetics following Adr treatment.** A. One representative series of two experiments showing the cell cycle status (live cell DNA binding dye, Hoechst33342) in relation to either apoptosis induction (Annexin V positive) or terminal cell death (PI positive), in untreated or Adriamycin treated (0.5  $\mu$ g/ml, 20 h) TSC1<sup>+/+</sup> and TSC1<sup>-/-</sup> cells. Black boxes at 20 h highlight cells with sub-G1 DNA content, but distinctly negative for both Annexin-V as well as PI in TSC1<sup>-/-</sup>, suggestive of mitotic catastrophe. B. Quantification of total cell death (Annexin-V + PI positive cells) in TSC1<sup>+/+</sup> and TSC1<sup>-/-</sup> cells treated as in A. See also the right-most column in A for both cell lines. Data-sets are a mean of duplicate samples from two independent experiments. Error bars represent standard deviation (SD).

Supplementary Table S1: G2-M checkpoint analysis

| Sample #                     | G2 Phase |        |          | Mitosis |        |          | Ratio G2/M |
|------------------------------|----------|--------|----------|---------|--------|----------|------------|
|                              | Expt 1   | Expt 2 | Geo-Mean | Expt 1  | Expt 2 | Geo-Mean |            |
| TSC1 <sup>+/+</sup> control  | 90.2     | 95.1   | 92.62    | 9.81    | 4.89   | 6.93     | 13.37      |
| TSC1 <sup>+/+</sup> 0.5h Adr | 94.7     | 99.7   | 97.17    | 5.35    | 0.292  | 1.25     | 77.74      |
| TSC1 <sup>+/+</sup> 1h Adr   | 98.8     | 99.947 | 99.37    | 1.16    | 0.053  | 0.25     | 400.77     |
| TSC1 <sup>+/+</sup> 4h Adr   | 99.7     | 100    | 99.85    | 0.288   | 0.021  | 0.08     | 1283.93    |
| TSC1 <sup>+/+</sup> 8h Adr   | 99.3     | 99.2   | 99.25    | 0.704   | 0.759  | 0.73     | 135.78     |
| TSC1 <sup>+/+</sup> 20h Adr  | 98.4     | 99.8   | 99.10    | 1.55    | 0.179  | 0.53     | 188.14     |
| TSC1 <sup>-/-</sup> Control  | 89.3     | 87.7   | 88.50    | 10.7    | 12.3   | 11.47    | 7.71       |
| TSC1 <sup>-/-</sup> 0.5h Adr | 92.1     | 99.2   | 95.58    | 7.95    | 0.845  | 2.59     | 36.88      |
| TSC1 <sup>-/-</sup> 1h Adr   | 93       | 99.956 | 96.42    | 6.98    | 0.044  | 0.55     | 173.98     |
| TSC1 <sup>-/-</sup> 4h Adr   | 96.4     | 99.8   | 98.09    | 3.57    | 0.178  | 0.80     | 123.04     |
| TSC1 <sup>-/-</sup> 8h Adr   | 98.5     | 99.5   | 99.00    | 1.48    | 0.507  | 0.87     | 114.29     |
| TSC1 <sup>-/-</sup> 20h Adr  | 96       | 98.6   | 97.29    | 3.97    | 1.31   | 2.28     | 42.66      |

Table with raw data from 2 independent EdU/DAPI/pSer10-HisH3 flow cytometric cell cycle profiling for G2/M checkpoint analyses.

Supplementary Table S2: Comparison between prototypic replication stress and the 'ERR' phenotype in tuberous sclerosis cells reported here

|                                               | Feature                                                          | Untransformed (Normal) Cells | Classical Replication Stress Ras-, Myc-, Cyclin E-driven tumors | Energy Restricted Replication (ERR) phenotype |
|-----------------------------------------------|------------------------------------------------------------------|------------------------------|-----------------------------------------------------------------|-----------------------------------------------|
| <b>Growth</b>                                 | mTORC1 activity status                                           | +                            | ++ (high)                                                       | +++ (constitutive)                            |
| <b>Signalling</b>                             | p53 activity status                                              | +                            | - (usually lost)                                                | +++ (upregulated)                             |
|                                               | Ori-Ori distance                                                 | ++++                         | ++ (drastic reduction)                                          | +++ (marginal reduction)                      |
|                                               | Fork Progression                                                 | ++++                         | +++                                                             | ++                                            |
| <b>Replication Properties</b>                 | Fork Asymmetry                                                   | -                            | +++ (Excess stalling)                                           | - (absent)                                    |
|                                               | Origin re-firing                                                 | -                            | +                                                               | -                                             |
|                                               | Nucleotide pools                                                 | ++ (normal)                  | + (frequently diminished)                                       | ++ (no shortage documented)                   |
| <b>Energetic Status</b>                       | ATP levels                                                       | +++                          | ++ (shortage)                                                   | + (severe shortage)                           |
| <b>RS Checkpoint Proficiency and Response</b> | ATR expression                                                   | ++                           | ++++ (frequently upregulated)                                   | + (downregulated)                             |
|                                               | Chk1 expression                                                  | ++                           | ++++ (frequently upregulated)                                   | ++ (unchanged)                                |
| <b>Cellular outcome</b>                       | Chromosome breaks, rearrangements and instability <i>in vivo</i> | -                            | +++                                                             | -                                             |
|                                               | Stress sensitivity                                               | +                            | - (evade apoptosis)                                             | +++ (hypersensitive)                          |
| <b>Tumour Properties</b>                      | Invasive capacity and metastasis                                 | -                            | +++ (malignant, aggressive)                                     | - (Benign hamartomas)                         |
